# Supplementary material for: A prognostic and therapeutic hallmark developed by the integrated profile of basement membrane and immune infiltrative landscape in lung adenocarcinoma
Source: PubMed Central journal article supplement (PMC9748099; doi:10.3389/fimmu.2022.1058493), 2022-11-30

Figure S1. Dotplot of 12 markers representative of each cell type.

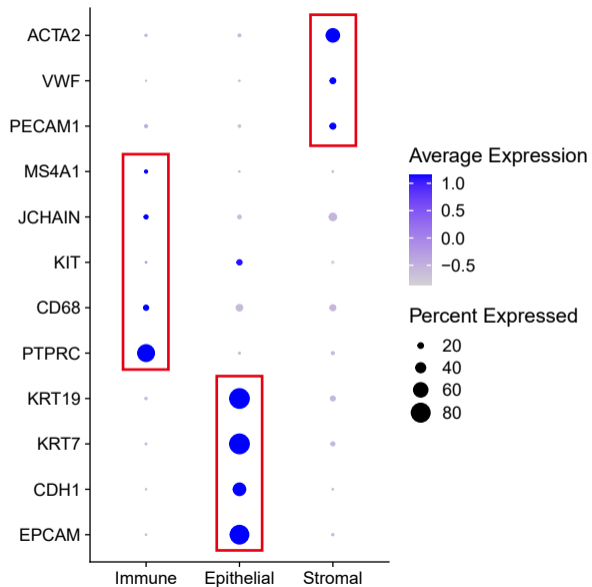

**Figure S2. The relationship between BM score and the abundance of T cells CD4 memory resting in GSE30219 and GSE81089 cohorts.**

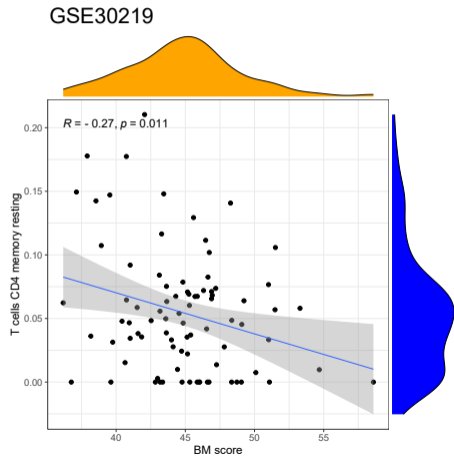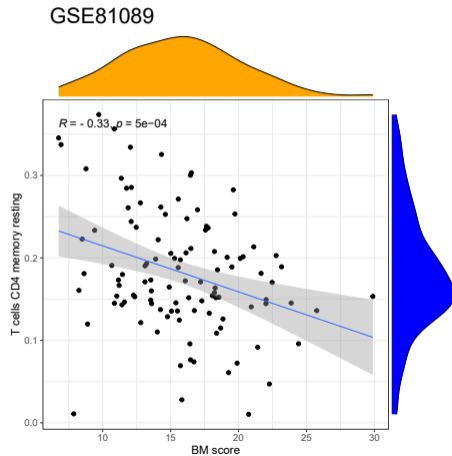

**Figure S3. WGCNA analysis. (A) Clustering dendrogram of TCGA-LUAD cohort before sample filtering. (B) Clustering dendrogram of TCGA-LUAD cohort after sample filtering. (C) Analysis of the scale-free index and mean connectivity for various soft-threshold powers ( $\beta$ ). (D) WGCNA cluster dendrogram and module assignment. The branches refer to clusters of genes that are highly connected. The colors in the horizontal bar represent the modules.**

(A)

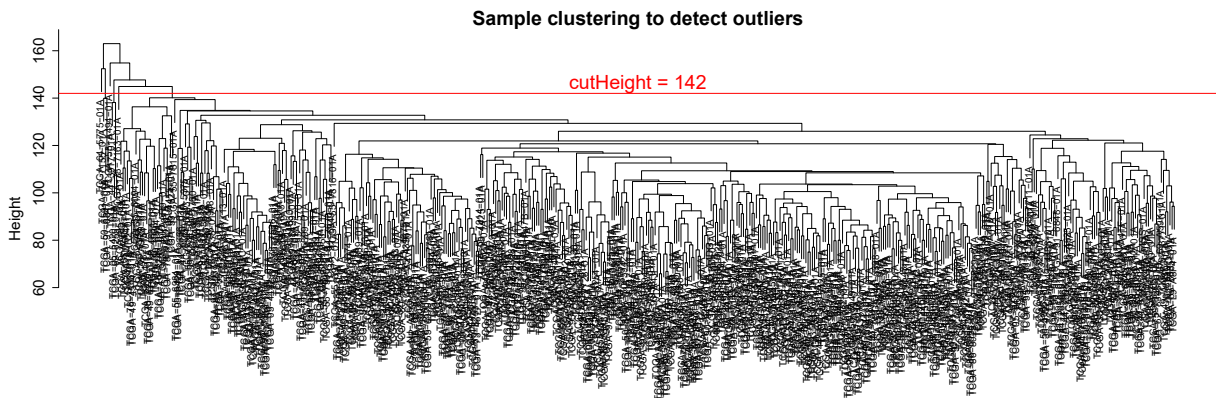

(B)

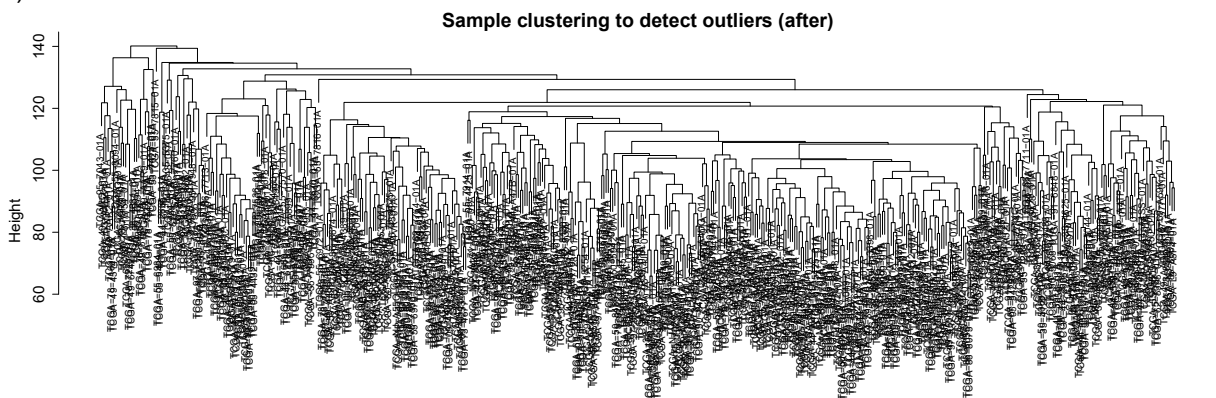

(C)

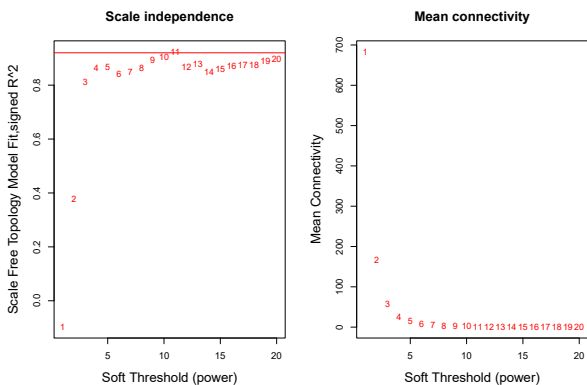

(D)

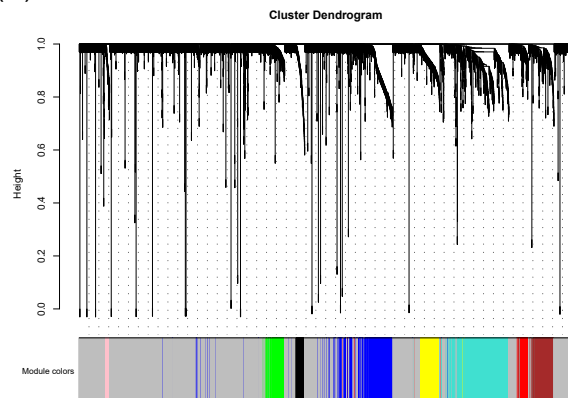

**Figure S4. Evaluation of the prognostic value of BM-TME classifier in 32 pan-cancer cohorts.**

**BM-TME classifier**

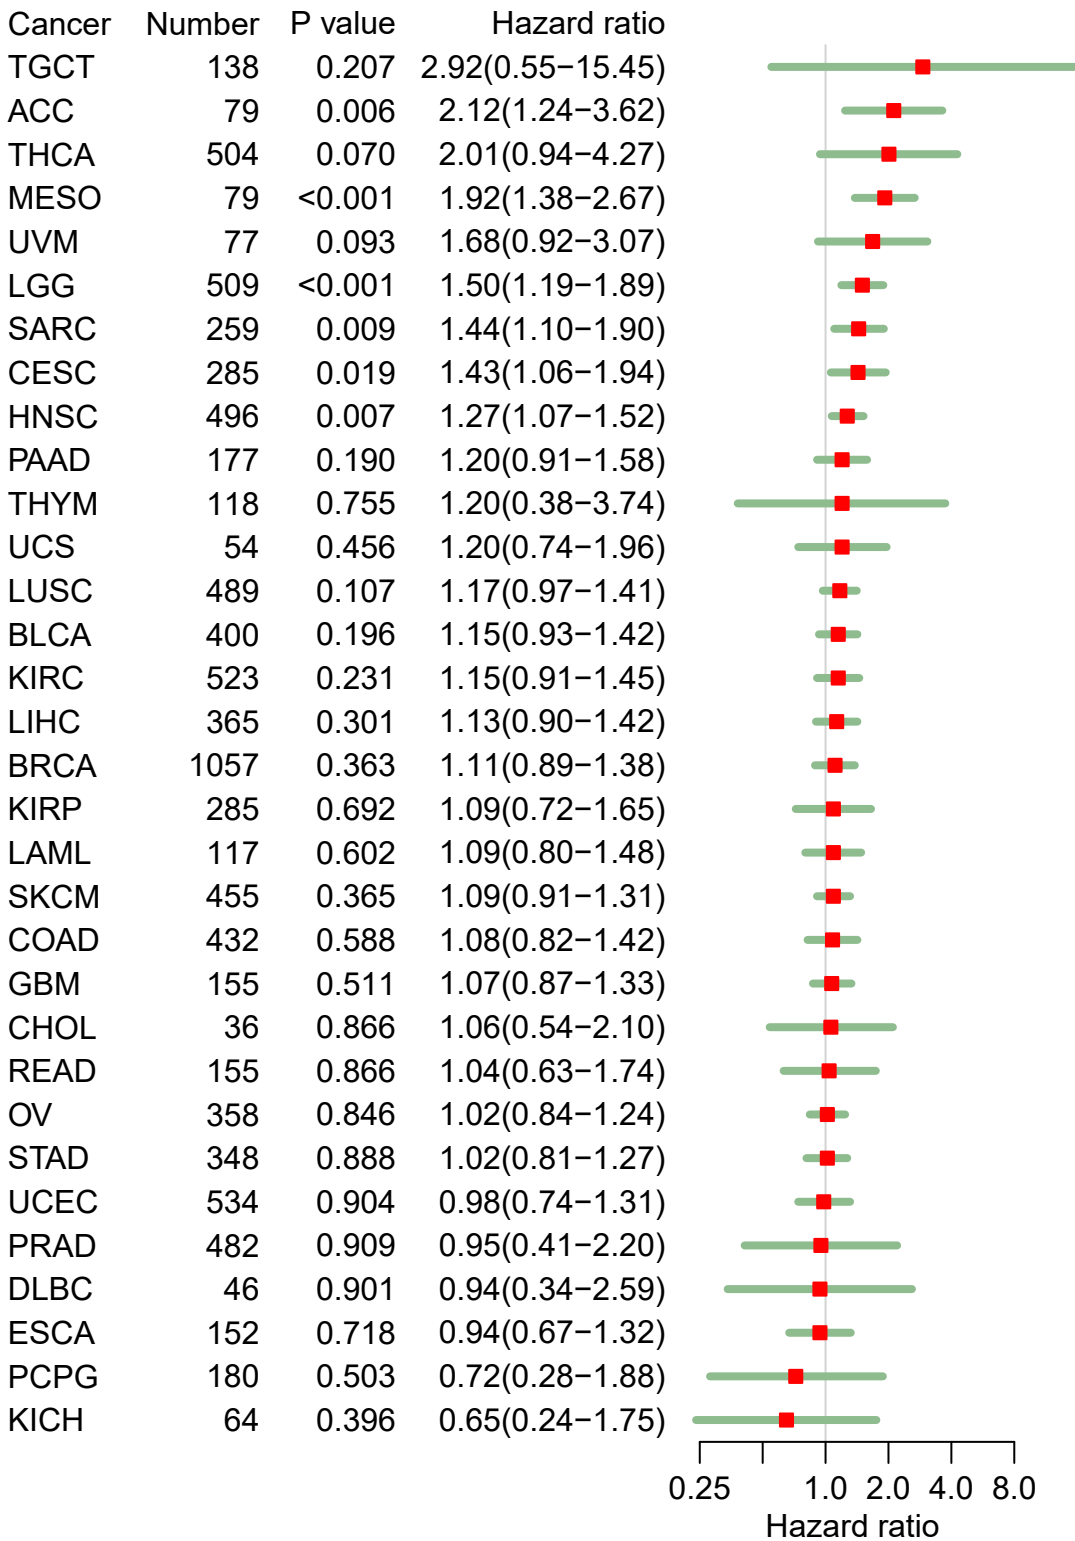

**Figure S5. The differential expression levels of immune checkpoint genes among BM-TME classifier subgroups in GSE50081 cohort.**

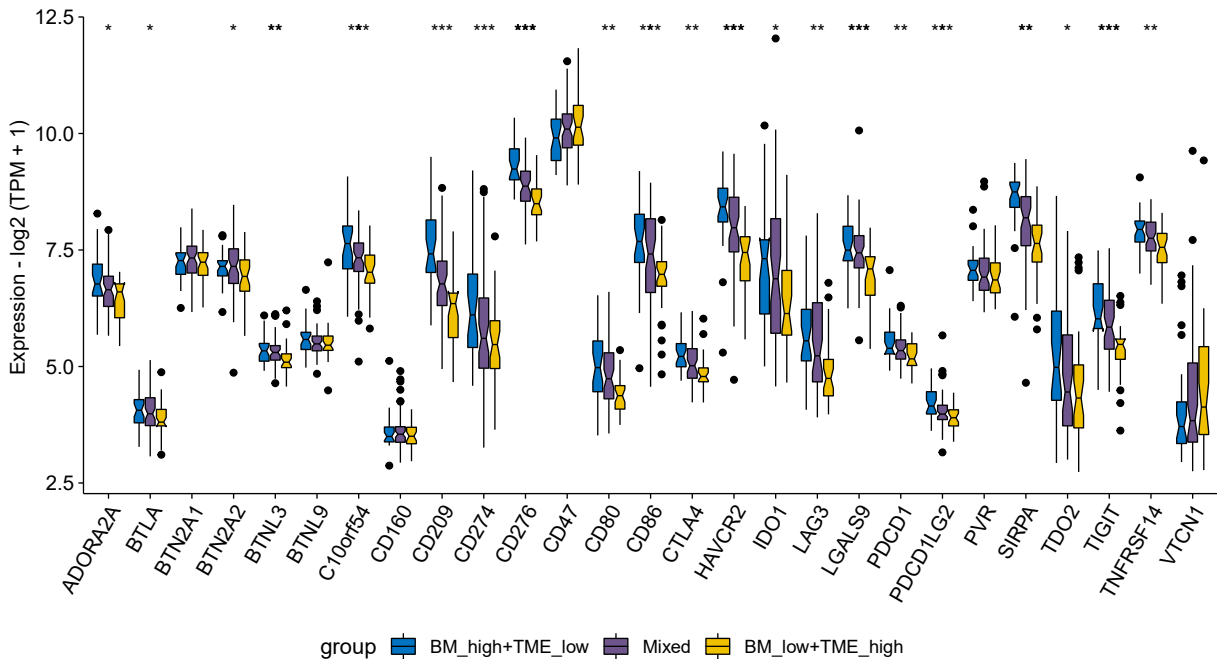

**Figure S6. Comparison of immunotherapy responses among different BM-TME classifier groups in GSE30219 and GSE135222 cohorts.**

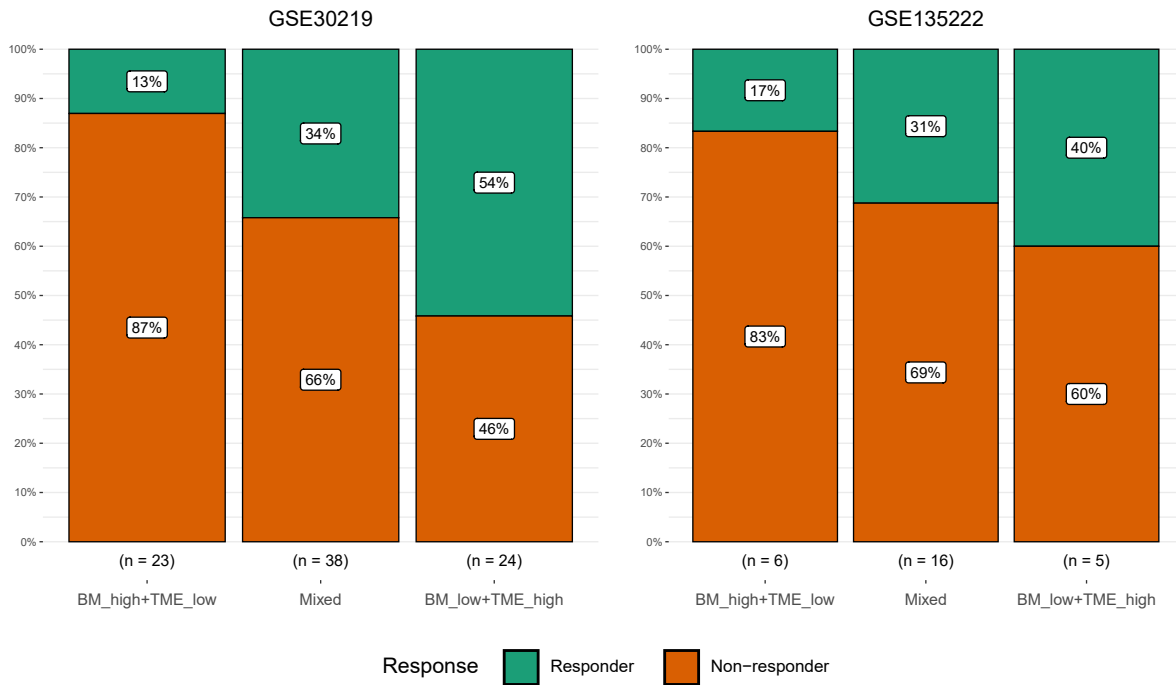

Supplement: Image_1.pdf [file Image_1.pdf]
